# Supplementary material for: Synthesis and cathodoluminescence properties of CdSe/ZnO hierarchical nanostructures
Source: Royal Society of Chemistry journal article supplement (doi:10.1039/c0jm03495a), 2011-01-01

**Supporting Information**

**Synthesis and cathodoluminescence properties of CdSe/ZnO hierarchical nanostructures**

N. Koteeswara Reddy, M. Devika, Nava Shpaisman, Moshit Ben Ishai,  
 and Fernando Patolsky \*

School of Chemistry, Tel Aviv University, Tel Aviv-69972, Israel

**SI\_1a:** Calculation of lattice mismatch (LM) between hexagonal (hex) ZnO and hexagonal CdSe using their bulk JCPDS data are given below.

$$LM = \frac{\text{difference}(a_c, a_b)}{\text{average}(a_c, a_b)}$$

|              | Structure   | a    | b    | c    | a-a%  | b-b%  | c-c%  | a-c%     |
|--------------|-------------|------|------|------|-------|-------|-------|----------|
| CdSe (core)  | <b>Hex.</b> | 4.30 | 4.30 | 7.01 |       |       |       |          |
| ZnO (branch) | <b>Hex.</b> | 3.25 | 3.25 | 5.21 | 27.82 | 27.82 | 29.54 | 19.07537 |

**SI\_1b:** EDX spectrum and elemental composition of as-grown CdSe nanorods grown by electrochemical deposition at room temperature.

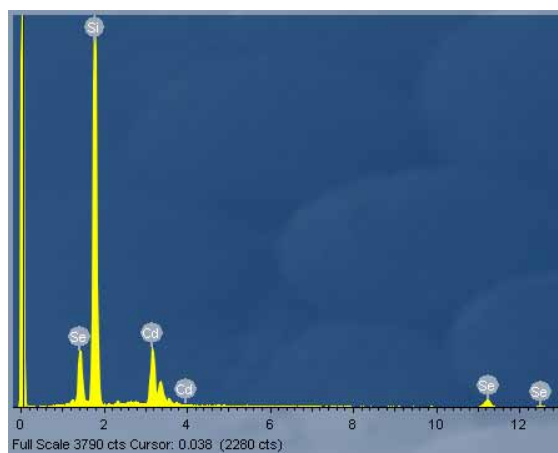

| Element | App   | Intensity | Weight% | Weight% | Atomic% |  |
|---------|-------|-----------|---------|---------|---------|--|
|         | Conc. | Corn.     |         | Sigma   |         |  |
| Se L    | 2.05  | 0.5974    | 39.35   | 1.32    | 48.02   |  |
| Cd L    | 4.68  | 0.8839    | 60.65   | 1.32    | 51.98   |  |
|         |       |           |         |         |         |  |
| Totals  |       |           | 100.00  |         |         |  |

**SI\_2:** Structural parameters of the ZnO NHs grown CdSe NR cores in a reaction time of 10 hours is given below with the standard data of ZnO (JCPDS: 01-089-1397).

| $2\theta$ | Observed d-value (nm) | Standard d-value (nm) | Miller Indices |
|-----------|-----------------------|-----------------------|----------------|
| 28.75     | 0.3103                | 0.3135                | Si (111) (sub) |
| 34.56     | 0.2595                | 0.2607                | (002)          |
| 36.23     | 0.2477                | 0.2476                | (101)          |
| 56.40     | 0.1631                | 0.1627                | (110)          |

**SI\_3:** Elemental composition of CdSe/ZnO heterostructures obtained from EDX-ESEM:

| Element     | App Conc. | Intensity Corrn. | Weight% | Atomic% | Weight% Sigma | Atomic ratio |
|-------------|-----------|------------------|---------|---------|---------------|--------------|
| <b>O K</b>  | 1.05      | 0.4351           | 6.99    | 26.09   | 0.76          |              |
| <b>Zn K</b> | 8.3       | 1.0196           | 29.88   | 27.28   | 0.74          | 1.05         |
|             |           |                  |         |         |               |              |
| <b>Se L</b> | 3.29      | 0.4403           | 24.68   | 22.12   | 0.67          |              |
| <b>Cd L</b> | 10.39     | 0.8485           | 38.45   | 24.26   | 0.76          | 1.10         |
|             |           |                  |         | 100     |               |              |

**SI\_4:** Roughly estimated dimensions of ZnO NHs grown on CdSe cores from ESEM studies:

| Parameter\RT (s)*                                         | 5   | 30  | 60  | 120 | 180 |
|-----------------------------------------------------------|-----|-----|-----|-----|-----|
| <b>AD (nm)</b>                                            | 13  | 19  | 27  | 32  | 36  |
| <b>AL (nm)</b>                                            | 24  | 67  | 90  | 135 | 143 |
| <b><math>\rho</math> (NHs/<math>\mu\text{m}^2</math>)</b> | 447 | 467 | 573 | 667 | 750 |
| <b>TNNHs in 1 <math>\mu\text{m}</math> length</b>         | 413 | 431 | 529 | 615 | 691 |

RT\*-reaction time, AD- average diameter, AL- average length,  $\rho$ - density of NHs, TNNHs- total number of nanohairs in 1 micro meter length.

**SI\_5:** Structural parameters of ZnO/CdSe nanostructures evaluated from XRD studies.

| RT (minutes) | ZnO (002)     |                |
|--------------|---------------|----------------|
|              | Height (a.u.) | FWHM (degrees) |
| <b>30</b>    | 414           | 0.336          |
| <b>60</b>    | 638           | 0.133          |
| <b>120</b>   | 1716          | 0.128          |
| <b>240</b>   | 2796          | 0.115          |

**SI\_6a:** The data obtained from the FFT analysis of Figure 6b:

| Spot# | d-Spacing (nm) | Rec. Pos. (1/nm) | Degrees to Spot 1 | Degrees to x-axis | Amplitude | Identified Phase |
|-------|----------------|------------------|-------------------|-------------------|-----------|------------------|
| 1     | 0.3701         | 2.702            | 0.00              | 139.83            | 2678.00   | CdSe(100)        |
| 2     | 0.3524         | 2.838            | 177.58            | 95.6              | 13308.00  | CdSe(002)        |
| 3     | 0.2157         | 4.636            | 25.68             | 114.15            | 1749.00   | CdSe(110)        |
| 4     | 0.1913         | 5.226            | 50.79             | 89.04             | 1351.00   | ZnO (102)        |
| 5     | 0.1427         | 7.007            | 39.89             | 99.94             | 922.00    | ZnO (200)        |
| 6     | 0.1283         | 7.795            | 50.52             | 89.31             | 810.00    | ZnO (004)        |

**SI\_6b:** Elemental composition of CdSe/ZnO heterostructures obtained from EDS-STEM:

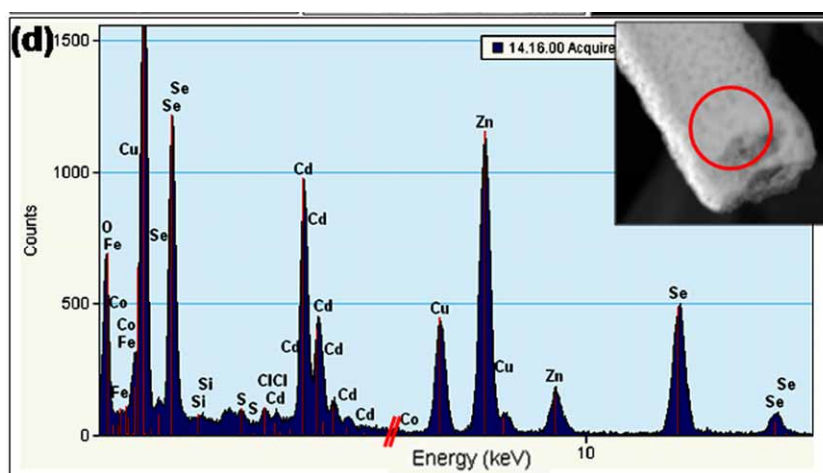

| Element | Weight % | Atomic % | Uncert. % | Correction | k-Factor | Atomic ratio |
|---------|----------|----------|-----------|------------|----------|--------------|
| O(K)    | 6.90     | 25.80    | 0.12      | 0.49       | 1.94     |              |
| Zn(K)   | 29.70    | 27.12    | 0.19      | 0.99       | 1.74     | 1.05         |
| Se(K)   | 24.02    | 19.13    | 0.18      | 1.00       | 2.42     |              |
| Cd(K)   | 36.24    | 22.12    | 0.45      | 0.97       | 7.12     | 1.16         |
| S(K)    | 1.88     | 3.80     | 0.05      | 0.92       | 1.016    |              |
| Cl(K)   | 1.24     | 2.09     | 0.03      | 0.95       | 1.057    |              |

**SI\_7: HRTEM image of CdSe/ZnO hierarchical nanostructures:**

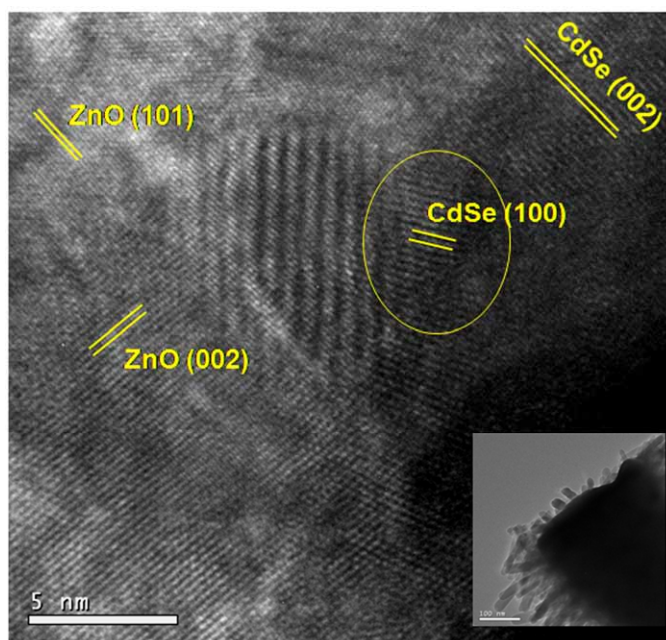

**SI\_8a:** SAED image of CdSe/ZnO heterostructures grown in a reaction time of 60 minutes taken on the marked area in the left TEM image.

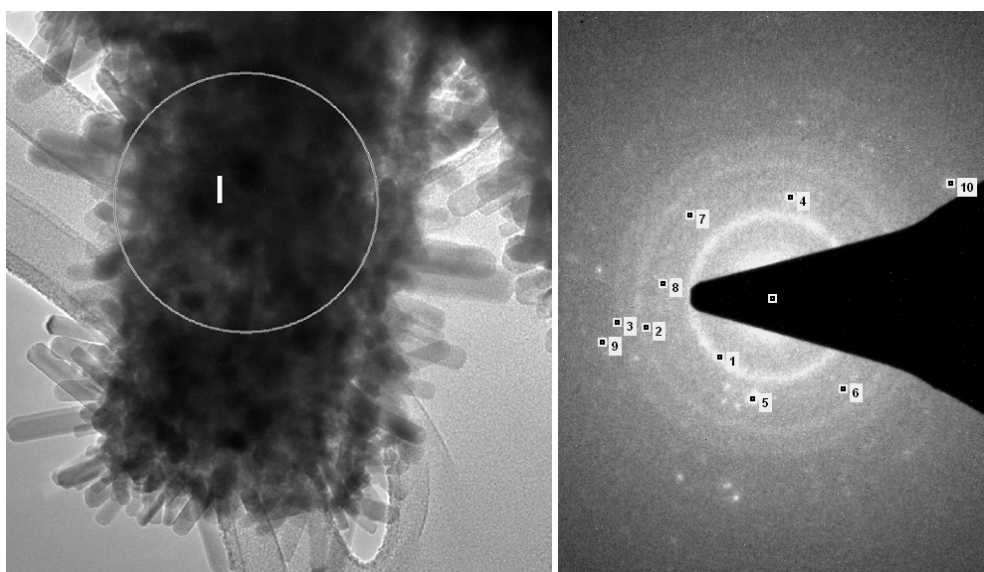

| Spot# | d-Spacing (nm) | Rec. Pos. (1/nm) | Degrees to Spot 1 | Degrees to x-axis | Amplitude | Identified phases |
|-------|----------------|------------------|-------------------|-------------------|-----------|-------------------|
| 1     | 0.3692         | 2.709            | 0.00              | -131.13           | 185.00    | CdSe (100)        |
| 2     | 0.2146         | 4.659            | 35.65             | -166.79           | 138.00    | CdSe (110)        |

|   |               |              |               |               |               |                          |
|---|---------------|--------------|---------------|---------------|---------------|--------------------------|
| 3 | 0.1863        | 5.368        | 39.84         | -170.98       | 141.00        | CdSe (200)               |
| 4 | <b>0.2834</b> | <b>3.528</b> | <b>149.43</b> | <b>79.44</b>  | <b>317.00</b> | <b>ZnO (100)</b>         |
| 5 | 0.2513        | 3.979        | 79.30         | -51.84        | 236.00        | CdSe (102)               |
| 6 | <b>0.2499</b> | <b>4.002</b> | <b>94.35</b>  | <b>134.52</b> | <b>220.00</b> | <b>ZnO (101)</b>         |
| 7 | <b>0.2658</b> | <b>3.762</b> | <b>56.41</b>  | <b>172.45</b> | <b>200.00</b> | <b>ZnO (002)</b>         |
| 8 | 0.1663        | 6.012        | 34.20         | -165.33       | 232.00        | CdSe (202)<br>/ZnO (110) |
| 9 | 0.1368        | 7.309        | 163.84        | 32.70         | 261.00        | CdSe (211)<br>/ZnO (112) |

**SI\_8b:** (a) EDS spectrum (inset is the STEM images where the EDS were recorded) and (b) line-scanning elemental mappings of CdSe/ZnO heterostructures.

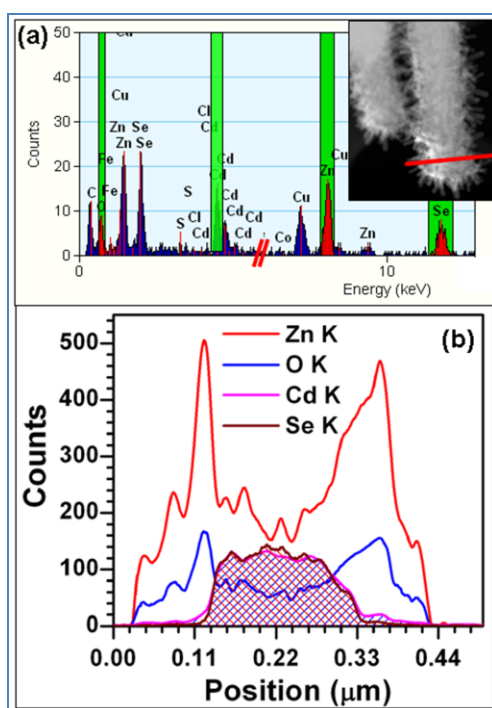

**SI\_9:** Theoretically evaluated optical band gap of the ZnO nanostructures grown on CdSe NRs at different reaction times (based on the diameter of the as-grown ZnO nanohairs). Here we used the following equation reported elsewhere [x],

$$E_g^* = E_g + \left( \frac{\hbar^2 \pi^2}{2\mu R^2} \right) - \left( \frac{1.8e^2}{\epsilon R} \right)$$

where  $E_g^*$  is the effective band gap,  $E_g$  - the band gap of the bulk material,  $h$  - Planck's constant,  $\mu$  - the reduced mass of the carriers,  $R$  - radius of the nanostructure,  $e$  - charge of the electron, and  $\epsilon$  - dielectric constant. To calculate the effective band gap of the nanostructures we used the data reported in the literature as follows:

For ZnO [y]:  $E_g \sim 3.4$  eV,  $h \sim 6.602 \times 10^{-34}$  Js,  $\mu \sim 0.194 m_0$  ( $1/\mu = 1/m_e^* + 1/m_h^*$ ;  $\therefore m_e^* \sim 0.318 m_0$ ,  $m_h^* \sim 0.5 m_0$ ),  $m_0$  - rest mass of the electron,  $R$  - from SI3,  $e = 1.602 \times 10^{-19}$  C and  $\epsilon \sim \epsilon_r \epsilon_0 \sim (8.12 \times 8.85 \times 10^{-12} \text{ C}^2/\text{Nm})$ .

For CdSe [z]:  $E_g \sim 1.75$  eV,  $h \sim 6.602 \times 10^{-34}$  Js,  $\mu \sim 0.088 m_0$  ( $1/\mu = 1/m_e^* + 1/m_h^*$ ;  $\therefore m_e^* \sim 0.11 m_0$ ,  $m_h^* \sim 0.45 m_0$ ),  $m_0$  - rest mass of the electron,  $R \sim 60$  nm,  $e = 1.602 \times 10^{-19}$  C and  $\epsilon \sim \epsilon_r \epsilon_0 \sim (10.2 \times 8.85 \times 10^{-12} \text{ C}^2/\text{Nm})$ .

**Table-I ZnO related data:**

| Parameter\RT (minutes)* | For ZnO nanostructures<br>Reaction time (minutes) |       |       |       |       |       |
|-------------------------|---------------------------------------------------|-------|-------|-------|-------|-------|
|                         | 5                                                 | 30    | 60    | 120   | 180   | 240   |
| Cal. $E_g^*$ (eV)       | 3.461                                             | 3.423 | 3.411 | 3.410 | 3.406 | 3.405 |
| Observed $E_g^*$ (eV)   |                                                   |       | 3.543 |       |       | 3.543 |
|                         | For ZnO nanostructures (~7 nm diameter)           |       |       |       |       |       |
| Cal. $E_g^*$ (eV)       | 3.559                                             |       |       |       |       |       |

**Table-II CdSe related data:**

| Diameter (nm) | Add factor (eV) | $E_g^*$ (eV) | Diameter (nm) | Add factor (eV) | $E_g^*$ (eV) |
|---------------|-----------------|--------------|---------------|-----------------|--------------|
| 3             | 1.9047          | 3.655        | 20            | 0.0429          | 1.793        |
| 4             | 1.0714          | 2.821        | 25            | 0.0274          | 1.777        |
| 5             | 0.6857          | 2.436        | 30            | 0.0190          | 1.769        |
| 6             | 0.4762          | 2.226        | 35            | 0.0140          | 1.764        |
| 7             | 0.3498          | 2.100        | 40            | 0.0107          | 1.761        |
| 8             | 0.2678          | 2.018        | 45            | 0.0085          | 1.758        |
| 9             | 0.2116          | 1.962        | 50            | 0.0069          | 1.757        |
| 10            | 0.1714          | 1.921        | 100           | 0.0017          | 1.752        |
| 15            | 0.0762          | 1.826        | 200           | 0.0004          | 1.750        |

T\*-reaction time

[x] L. Brus, J. Phys. Chem. **90**, 2555 (1986).

[y] (a) A. Ohtomo, K. Tamura, K. Saikusa, K. Takahashi, T. Makino, Y. Segawa, H. Koinuma, and M. Kawasaki, Appl. Phys. Lett. **75**, 2635 (1999). (b) D. L. Rode, Semicond. Semimet. **10**, 1 (1975). (c) O. Medelung (Ed.) and Landolt-Bornstein, Semiconductors, Springer, Berlin **III-17**, 35-115 (1998).

[z] A. Urbieto, P. Fernández, and J. Piqueras, J. Appl. Phys., Vol. 96, 2004, 2210.

**SI\_10:** Schematic representation of energy level band diagram of CdSe [x, y] and ZnO with its impurity levels, respectively.

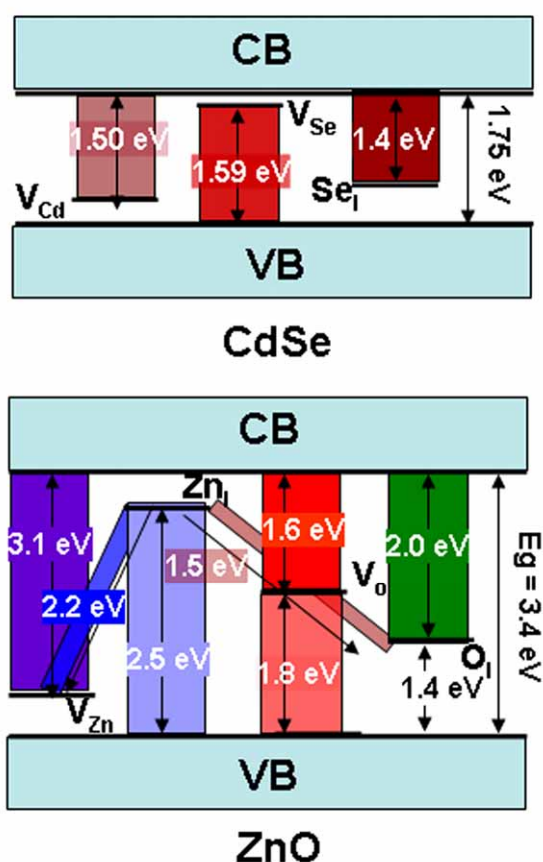

[x] A. Urbieto, P. Fernández, and J. Piqueras, J. Appl. Phys., Vol. 96, 2004, 2210.

[y] A. Urbieto, P. Fernández, and J. Piqueras, Appl. Phys. Lett., Vol. 85, 59687, 2004.

**SI\_11:** De-convoluted CL images of CdSe, CdSe/ZnO grown in 1 hour and CdSe/ZnO grown in 4 hours and the obtained data are given below. The equation used to calculate the peak intensity ratio and percentage of improvement in their intensities are also state bellow.

For CdSe:

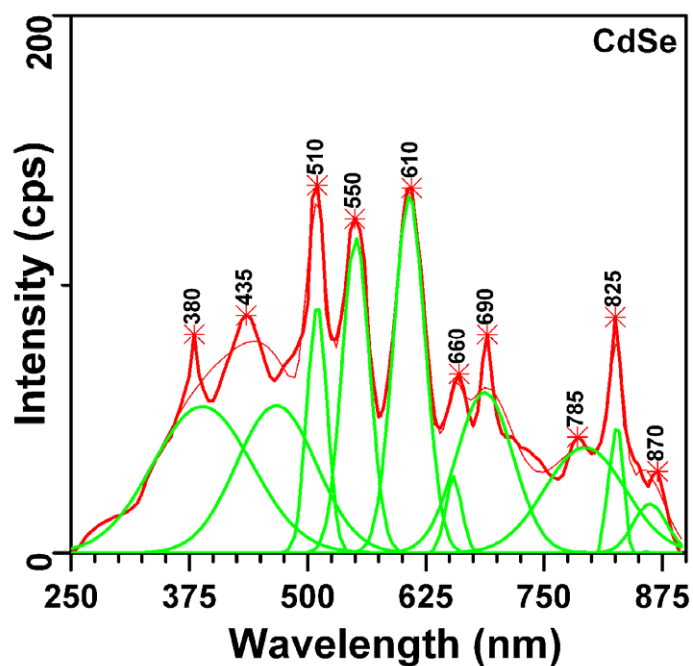

[30/12/2009 16:59 "/Graph1" (2455195)]

Gauss(10) fit to Smoothed23\_Book1M:

Chi<sup>2</sup>/DoF 37

R<sup>2</sup> 1

| Peak | Area          | Center        | Width         | Height        |                                       |
|------|---------------|---------------|---------------|---------------|---------------------------------------|
| 1    | 7174.3        | 388.76        | 104.97        | 54.532        |                                       |
| 2    | 5802.9        | 466.89        | 84.334        | 54.901        |                                       |
| 3    | <b>2424.1</b> | <b>509.90</b> | <b>20.684</b> | <b>93.512</b> | (peaks matched with other structures) |
| 4    | <b>4277.7</b> | <b>550.88</b> | <b>28.991</b> | <b>117.73</b> |                                       |
| 5    | 5569.7        | 607.39        | 33.382        | 133.12        |                                       |
| 6    | <b>596.23</b> | <b>659.32</b> | <b>16.762</b> | <b>28.380</b> |                                       |
| 7    | <b>4489.1</b> | <b>687.16</b> | <b>59.990</b> | <b>59.707</b> | (CdSe NBE peak)                       |
| 8    | 4204.6        | 793.18        | 85.246        | 39.354        |                                       |
| 9    | 871.88        | 825.69        | 13.053        | 53.294        |                                       |
| 10   | <b>805.36</b> | <b>870.71</b> | <b>35.170</b> | <b>18.271</b> |                                       |

Y offset = 0



For CdSe/ZnO: grown in 1 hour reaction time:

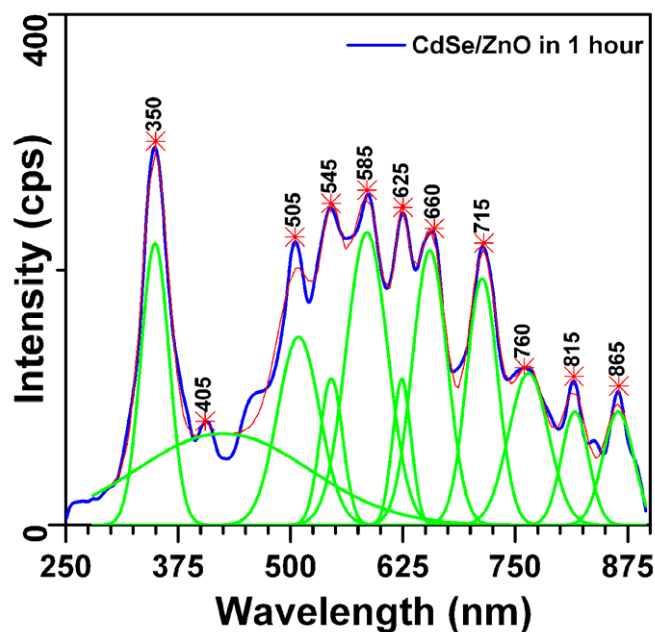

[03/01/2010 12:15 "/Graph1" (2455199)]

Gauss(11) fit to Smoothed24\_Book1D:

Chi<sup>2</sup>/DoF 132

R<sup>2</sup> 1

| Peak      | Area          | Center        | Width         | Height        |                       |
|-----------|---------------|---------------|---------------|---------------|-----------------------|
| <b>1</b>  | <b>8653.4</b> | <b>349.31</b> | <b>28.818</b> | <b>239.59</b> | <b>(ZnO NBE peak)</b> |
| 2         | 17237         | 424.87        | 191.78        | 71.713        |                       |
| <b>3</b>  | <b>8619.6</b> | <b>505.06</b> | <b>45.199</b> | <b>152.16</b> |                       |
| <b>4</b>  | <b>3613.0</b> | <b>545.36</b> | <b>21.983</b> | <b>131.13</b> |                       |
| 5         | 13164         | 584.90        | 44.182        | 237.73        |                       |
| 6         | 2928.2        | 623.78        | 16.808        | 139.01        |                       |
| <b>7</b>  | <b>10400</b>  | <b>654.97</b> | <b>36.607</b> | <b>226.68</b> |                       |
| 8         | 8403.5        | 715.07        | 32.468        | 206.52        |                       |
| 9         | 6605.0        | 764.75        | 42.702        | 123.41        |                       |
| 10        | 3339.4        | 816.22        | 27.565        | 96.661        |                       |
| <b>11</b> | <b>3800.9</b> | <b>864.38</b> | <b>32.034</b> | <b>94.669</b> |                       |

Y offset = 0

For CdSe/ZnO: grown in 4 hours reaction time:

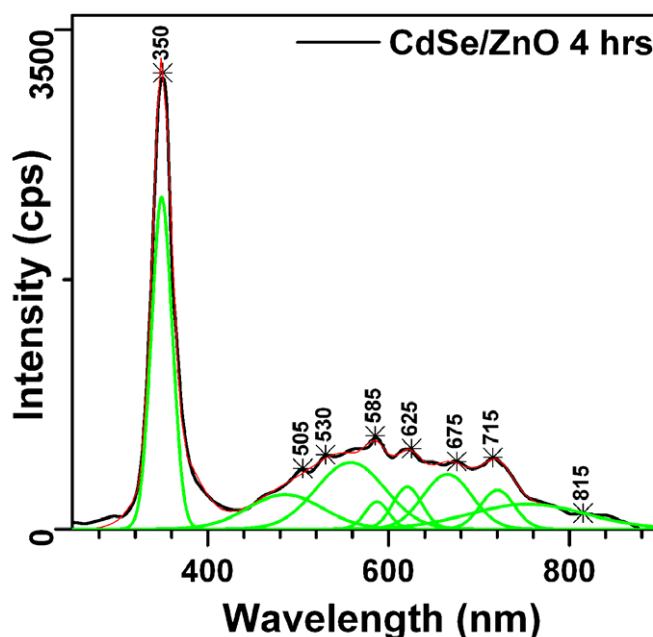

[03/01/2010 12:40 "/Graph1" (2455199)]

Gauss(9) fit to Smoothed25\_Book1G:

Chi<sup>2</sup>/DoF 2180

R<sup>2</sup> 1

| Peak | Area   | Center       | Width  | Height |                |
|------|--------|--------------|--------|--------|----------------|
| 1    | 66547  | 349.31       | 19.172 | 2769.5 | (ZnO NBE peak) |
| 2    | 25037  | 485.50 (505) | 82.245 | 242.89 |                |
| 3    | 44553  | 558.08 (530) | 75.257 | 472.35 |                |
| 4    | 6290.4 | 584.91       | 22.973 | 218.47 |                |
| 5    | 11845  | 624.77       | 29.521 | 320.15 |                |
| 6    | 25959  | 669.15 (675) | 52.813 | 392.18 |                |
| 7    | 12787  | 715.28       | 35.373 | 288.44 |                |
| 8    | 28166  | 753.81 (816) | 128.50 | 174.90 |                |

Y offset = 0

\*number given in brackets indicates its actual peak position.

**Intensity ratio** = CdSe/ZnO peak intensity/bare CdSe peak intensity

**Improvement percentage in emission intensity** = (CdSe/ZnO intensity - bare CdSe intensity)\*100/( CdSe/ZnO intensity + bare CdSe intensity)

**SI\_12:** CL spectra of CdSe/ZnO hierarchical nanostructures grown in a reaction time of (a) 1 and (b) 4 hours, which are divided into two bands by Gaussian fitting of the QCUV peak.

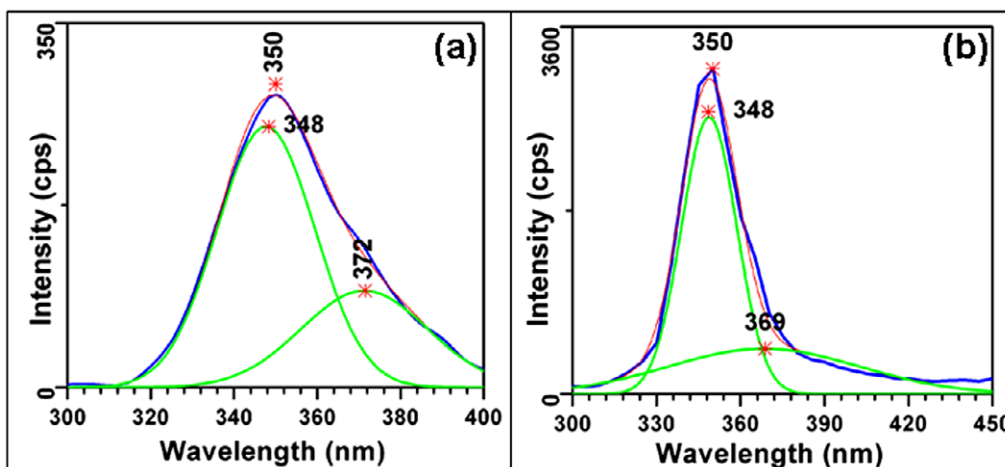

The data obtained from Gaussian fit of the above curves:

1. CdSe/ZnO structures grown in a reaction time of 1 hour

---

| Peak | Center (nm) | FWHM (nm) | Height (cps) |
|------|-------------|-----------|--------------|
| 1    | 347.64      | 23.228    | 249.71       |
| 2    | 370.97      | 29.660    | 93.084       |

---

2. CdSe/ZnO structures grown in a reaction time of 4 hour

---

| Peak | Center (nm) | FWHM (nm) | Height (cps) |
|------|-------------|-----------|--------------|
| 1    | 348.81      | 19.298    | 2768.4       |
| 2    | 368.33      | 68.220    | 443.25       |

---

\*FWHM – full width at half maximum

**SI\_13:** CL measurements on the ZnO ALD-seeded CdSe NRs. From this CL spectrum, a clear QCUV peak related to ZnO nanoparticles, formed using Atomic Layer Deposition, on CdSe NRs with an average thickness of ~7 nm can be noticed (also, TEM measurements confirmed the presence of a dense nanoparticles layer formed by ALD at our particular deposition conditions, with a nanoparticle average diameter of 6-7nm). Apart from this, few additional peaks related to ZnO can be noticed. Thus, it is a clear that the observed QCUV peak from CdSe/ZnO hierarchical nanostructures is originated from ZnO nanoparticles, as well as nanohairs, having an average diameter of ~7 nm.

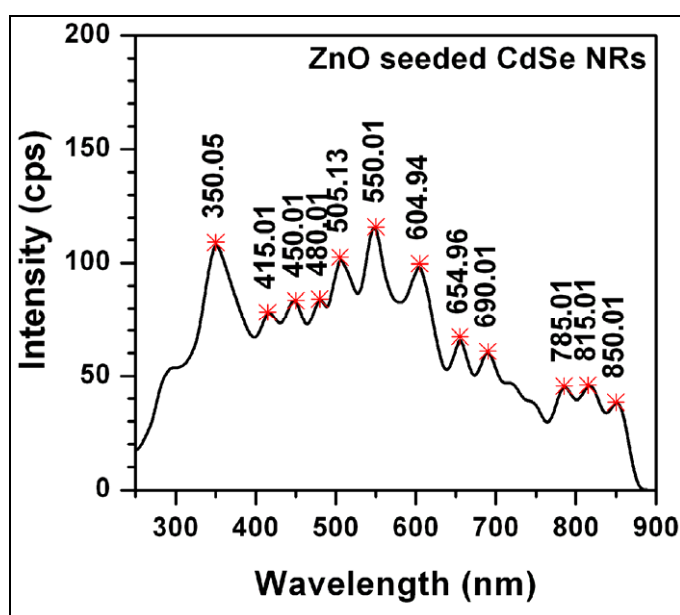

Supplement: c0jm03495a.pdf [file c0jm03495a.pdf]
